# Supplementary material for: Therapeutic Potential and Biological Applications of Cordycepin and Metabolic Mechanisms in Cordycepin-Producing Fungi
Source: PubMed Central journal article supplement (PMC6632035; doi:10.3390/molecules24122231), 2019-06-14
Supplement: molecules-24-02231-s001.pdf [file molecules-24-02231-s001.pdf]

**Table S1.** Anti-cancer potential of COR.

| Cancer                | Pathway                                                              | Mechanisms                                                                                                      | Sample                | O/I | References |
|-----------------------|----------------------------------------------------------------------|-----------------------------------------------------------------------------------------------------------------|-----------------------|-----|------------|
| leukemia              | <b>POM</b>                                                           | ↑COR->↑Inhibiting polyadenylation of mRNA                                                                       | MEC                   | O   | [7]        |
|                       | <b>apoptosis</b>                                                     | ↑COR/COR-MP->(×)cAMP->↑PKA->↑phosphorylate TdT->↑apoptosis                                                      | TdT-LCs               | O   | [118]      |
|                       | <b>apoptosis</b>                                                     | ↑COR->↑ROS->↑caspase8/9->↑caspase3/5/7->↑apoptosis                                                              | U937/THP-1            | O   | [38]       |
|                       | <b>Cell circle</b>                                                   | ↑COR->↑p21/↑p27->↓Cyclin D1/E->↑arrest in G1 phase                                                              | BCRC60176             | O   | [42]       |
|                       | Cell circle                                                          | ↑COR->↓p-Akt->↑GSK-3b->↓β-catenin->↓Cyclin(D1->↑arrest in G1 phase                                              | U937                  | O   | [41]       |
|                       | <b>apoptosis</b>                                                     | ↑COR->↑Caspase-3->↓PARP->↑apoptosis                                                                             | HL-60                 | O   | [119]      |
|                       | apoptosis                                                            | ↑COR->↑ROS->↑Bax(cytoplasm)->↑cytochrome c(cytoplasm)->↑apoptosis                                               | K562/293T             | O   | [120]      |
|                       | apoptosis /PTKs                                                      | ↑COR->↓p-PI3K/↓p-Akt->↓p-hTERT->↓telomerase->↑apoptosis                                                         | U937/THP-1            | O   | [33]       |
|                       | apoptosis                                                            | ↑COR->↑p53->↑Bax(cytoplasm)->↑caspase-9->↑apoptosis                                                             | NB-4/U937             | O   | [35]       |
|                       | <b>autocrine</b>                                                     | ↑COR->↓β-catenin/↓N-cadherin->↑apoptosis                                                                        | U937/K562             | O/I | [46]       |
| <b>paracrine</b>      | ↑COR->↑Dkk1&&[↓NFκ B->↓VCAM-1/↓IL-8/↓IL-6/↓FAK/↓CXCL12]->↓LSCs/↓LSIs | MSSCs                                                                                                           |                       |     |            |
| Thyroid cancer        | <b>apoptosis</b>                                                     | ↑COR->↑Adenosine A1 receptor/↑Adenosine A3 receptor->↑IC>↑calpain-> ↑caspase7-> ↓PARP->↑apoptosis               | CGTH W-2              | O   | [31]       |
| Breast cancer         | Invasion/ MAPK                                                       | ↑COR->↓TPA->↓AP-1->↓MMP-9->↓invasion                                                                            | MCF-7                 | O   | [51]       |
|                       | <b>apoptosis</b>                                                     | ↑COR->↑Bax(cytoplasm)->↑cytochrome c(cytoplasm)->↑caspases-9->↑caspases-3->↓PARP->↑apoptosis                    | MDA-MB-231            | O   | [32]       |
|                       | <b>autophagy</b>                                                     | ↑COR->↑LC3-II/↑AVOs ->↑autophagic cell death                                                                    | MCF-7                 |     |            |
|                       | apoptosis                                                            | ↑COR->↓PARP->↓repair of DNA single strand->↓highly undifferentiated cancer cell death                           | MDA-MB-231/MDA-MB-435 | O   | [57]       |
| Lung cancer           | Anti-inflammatory                                                    | ↑COR->↓TNF-α->↓LPS->↓lung inflammation                                                                          | Lung injury/mice      | I   | [121]      |
|                       | apoptosis /NFκ B                                                     | ↑COR->↓PARP-1->↑apoptosis                                                                                       | MCF-7                 |     |            |
|                       | <b>migration /MAPK</b>                                               | ↑COR->↓MMP-9/↓MMP-2->↓migration                                                                                 | CL1-0                 | O   | [50]       |
|                       | <b>proliferation</b>                                                 | ↑COR->↓tyrosinases->↓proliferation                                                                              | A549/ Calu-3          | O   | [54]       |
|                       | apoptosis                                                            | ↑COR->↓Bcl-2(cytoplasm)/↑Bax(cytoplasm)->↑C-caspases-3->↑Arrest in G <sub>0</sub> /G <sub>1</sub> phase         | H1975                 | O   | [9]        |
|                       | <b>Cell circle</b>                                                   | ↑COR->↓p-EGFR->↓p-AKT/↓p-ERK1/2->↑Arrest in G <sub>0</sub> /G <sub>1</sub> phase                                |                       |     |            |
|                       | <b>apoptosis</b>                                                     | ↑COR->↓NOS->↓NO->↓p-EKR->↑GSK-3β->↓Slug->↑Bax(cytoplasm)->↑C-caspases-3->↑apoptosis                             | A549                  | O   | [40]       |
| Prostate cancer       | migration /invasion                                                  | ↑COR->↓p-Akt->↓MMP-9/↓MMP-2->↑TJA/↓migration/↓invasion                                                          | LNCaP                 | O   | [49]       |
|                       | apoptosis                                                            | ↑COR->↑ROS->↑Bax(cytoplasm)->↑cytochrome c(cytoplasm)->↑caspases-9->↑caspases-3->↓PARP/↓MMP ->↑apoptosis        | PC-3                  | O   | [122]      |
| Hepatocellular cancer | apoptosis                                                            | ↑COR->↓p-JNK->↑Bax(cytoplasm)/↓Bcl-2(cytoplasm)/↓Bcl-xL/↓IAP->↑caspase->↓PARP/↑C-PRAP /↓β-catenin->↑apoptosis   | TRAIL-Hep3B           | O   | [123]      |
|                       | <b>migration</b>                                                     | ↑COR->↓ERp57/↓GLUD-1/↓GST-pi/↓PGK-1->↓migration                                                                 | HepG2/Hep3B           | O   | [124]      |
|                       | LI                                                                   | ↑COR->↑NDEA->↓AST/↓ALT/↑TNF-α/↑IL-6/↑IL-1/↓SOD/↑MDA/↓HC/↑p-PI3K/↑p-Akt/↑p-mTOR/↓Nrf2/↓HO-1/↑p-IκBa/↑p-NF-κB/p65 | MAM(6-8w)N            | I   | [37]       |
|                       | LI                                                                   | ↑COR->IACIILIN                                                                                                  |                       |     |            |
| colonic cancer        | <b>apoptosis</b>                                                     | ↑COR->↑DR3->↑caspase-8->↑caspase-1&&[↑C-caspase-3->↑C-PRAP]->↑apoptosis                                         | HT-29                 | O   | [34]       |
|                       |                                                                      | ↑COR->↑ROS->(×)p53->(×)Bax/(×)Bcl-2&&↑caspase-8->↑caspase-1&&[↑C-caspase-3->↑C-PRAP]->↑apoptosis                |                       |     |            |

|                     |               |                                                                                                            |                 |     |       |
|---------------------|---------------|------------------------------------------------------------------------------------------------------------|-----------------|-----|-------|
| Gallbladder Cancer  | apoptosis     | ↑COR->↑Bax/↓Bcl-2->↑C-caspase-9->↑C-caspase-3->↑C-PARP->↑Arrest in S phase                                 | NOZ/GBC-SD      | O   | [125] |
|                     | proliferation | ↑COR->↑AMPK->↓mTORC1->↓MDR/↓HIF-1α->↓proliferation                                                         | GBC-SD          | O   | [11]  |
| Renal cancer        | proliferation | ↑COR->↑p-p38 MAPK->↑p-Erk->↓proliferation                                                                  | 786-O           | O   | [53]  |
| cervical cancer     | Cell circle   | ↑COR->↓CHK1/↑p-CHK1->↓cyclinB1/↓Cdc2->↑Arrest in G <sub>2</sub> /M                                         | HeLa            | O   | [43]  |
| Glioblastoma cancer | migration     | ↑COR->↓integrin β1 receptor->↓p-FAK->↓p-paxillin->↓p-Akt->↓migration                                       | ANM/U87MG/LN229 | O/I | [10]  |
| Oral Cancer         | AJ            | ↑COR->↑E-cadherin/↓N-cadherin->↓migration/Arrest in G <sub>2</sub> /M                                      | OCBM/SAS/OEC-M1 | O/I | [52]  |
| brain cancer        | apoptosis     | ↑COR->↓GPX/↓SOD/↓Catalase->↑ROS&&↑LC3I/II/↑p53->↑Bax/↓BCL-2->↑Caspase-9->↑Caspase-3->↑autophagy/↑apoptosis | SH-SY5Y/ U-251  | O   | [36]  |

Note:

**POM:** Polyadenylation of Mrna. **MEC:** murine erythroleukemia cells. **TdT-LCs:** TdT-positive leukemia cells. **p-Akt:** phosphorylated Akt. **p-GSK-3b:** phosphorylated GSK-3b. **p-MAPK:** phosphorylated MAPK. **O:** *In vitro*(Out of body). **I:** *in vivo*(In body). **IL:** interleukin. **SOD:**Superoxide Dismutase. **NOS:**nitric oxide synthase. **GPX:**Glutathione peroxidase. **LC3-II:** an autophagosome marker and the cytoplasmic form LC3-I (18 kDa) is converted to LC3-II during autophagy[16]. **LPS:** lipopoly saccharide. **AVOs:** acidic vesicular organelles. **PLC:** phospholipase C. **EGFR:** epidermal growth factor receptor. **p-EGFR:** phosphorylated epidermal growth factor receptor. **AP-1 and NF-κB:** transcription factors, binding to the promoter of MMP-9 gene and playing an important role in regulating MMP-9[15]. **IC:** intracellular calcium. **LSCs:** leukemic stem cells. **MSCs:** mesenchymal stromal/stem cells. **MMPs:** matrix metalloproteinases, such as MMP-2 and MMP-9. **TPA:** 12-O-tetradecanoylphorbol-13-acetate. **PARP:** Poly (ADP-ribose) polymerase. **MI:** mitochondria injury. **TJA:** tight junction activity. **CMI:** cell migration and invasion. **TRAIL:** tumor necrosis factor-related apoptosis-inducing ligand. **MAM(6-8w) N:** Male Akr mice of 6-8 weeks treating with N-nitrosodiethylamine. **NDEA:** N-nitrosodiethylamine. **ILI:** indicators of liver injury. **LI:** liver injury. **HC:** histopathology condition. **IACILIN:** Inhibiting all the changes of indicators in the injury liver induced by NDEA. ↑: activated or increased by cordycepin. ↓: inactivated or decreased by cordycepin. (×↑): slightly increase by cordycepin. (×↓): slightly decrease by cordycepin. (×): not significantly induced/inhibited by COR or pathway didn't exist in the work. &&: and. (?): speculated pathway. **DR3:** death receptor3. **mTORC1:** mTOR complex 1(involving mTOR, Raptor and mSIN1). **TJA:** tight junction activity. **HIF-1α:** hypoxia-inducible factor 1α. **MDR:** multiple drug resistant. **AMPK:** AMP-activated protein kinase. **A->B:** upstream A induces down stream B. **ANM:** athymic nude mice. **OCBM:** Oral Cancer-Bearing Mice. **AJ:** Adherens Junctions. **FA:** Focal Adhesion. **AG:** Antioxidant Genes.

Table S2. Anti-tumor potential of COR.

| Tumor            | Pathway                   | Mechanisms                                                                                                        | Sample    | O/I | References |
|------------------|---------------------------|-------------------------------------------------------------------------------------------------------------------|-----------|-----|------------|
| multiple myeloma | apoptosis                 | ↑COR->↑COR-TP->↓transcripts of <i>MET</i> ->↑apoptosis                                                            | MM.1S     | O   | [58]       |
| Renal            | apoptosis                 | ↑COR->↑p-eIF2α->↑p-mTORC1->↓NF-κB(p65)->↑Sensitizing TNF-α-induced apoptosis                                      | NRK-52E   | O   | [61]       |
| Leydig Tumor     | MAPK                      | ↑COR->↑p-PKC->↑p-JNK/↓p-ERK1/2->↑steroidogenesis/↑tumor cell death                                                | MA-10     | O   | [64]       |
|                  | apoptosis                 | ↑COR->↑ROS->↑caspase-8->↑caspase-3->↓PARP->apoptosis                                                              | MA-10     | I/O | [59]       |
|                  | Cell circle               | ↑COR->(PI3K)↓p-AKT->↓p-mTOR                                                                                       |           |     |            |
|                  | Cell circle               | ↑COR->↑TGFβ2->↑p-p38->↑p-p53->↑p21->Arrest in G <sub>1</sub> phase                                                |           |     |            |
| autophagy        | ↑COR->↑LC3 II->↑autophagy |                                                                                                                   |           |     |            |
| glioma           | apoptosis                 | ↑COR->↑Adenosine A <sub>2A</sub> receptor->↑p-p53->↑C-caspase-7->↓PARP->↑apoptosis                                | C6 glioma | O   | [60]       |
| EBV-PT           | MAPK                      | ↑COR&&doxorubicin->↑p-PKC->↑p-p38->↑p-C/EBPβ(CTF)->↑ <i>BZLF1</i> promoter->↑inhibiting EBV-infected tumor growth | SMAE      | I/O | [17]       |
| IS               | -                         | ↑CE-CM->↑CP/↑SP/↑NK-CA/↑cytokines(↑IFN-γ/↑TNF-α/↑IL-2/↑IL-10)->↑IS                                                | CI-IM     | I   | [146]      |

Note:

**COR-TP:** COR triphosphate. **BMDMs:** bone marrow-derived macrophages. **O:** *In vitro*(Out of body). **I:** *in vivo*(In body). **SMAE:** SCID mice/AGS-EBV. **EBV-PT:** Epstein-Barr virus-positive tumor. **CTF:** cellular transcription factor. **CE-CM:** Culture extract of *C. militaris*. **IS:** Immunostimulatory. **CP:** cell proliferation. **SP:** splenocyte proliferation. **NK-CA:** NK cell activity. **CI-IM:** Cyclophosphamide-induced immunosuppressed mice. **C/EBPβ:** CCAAT/enhancer binding protein β, which can bind to *BZLF1* promoter and activates the transcription of *BZLF1*.

**Table S3.** Anti-inflammatory and anti-oxidant potential of COR.

| Disease                     | Pathway | Mechanisms                                                                                                                                       | Sample          | O/I | References |
|-----------------------------|---------|--------------------------------------------------------------------------------------------------------------------------------------------------|-----------------|-----|------------|
| RIOD                        | -       | ↑COR->↑SOD/↑CAT/↑GPx/↑GR/↑GST/↑GSH/↑VC/↑VE/↓MDA/↓AST/↓ALT/↓urea/↓creatinine->↑antioxide/↓lipid peroxidation                                      | aged rats       | I   | [75]       |
| tubulointerstitial fibrosis | ROS     | ↑COR->↓NADPH oxidase->↓ROS->↑antioxide                                                                                                           | HK2             | O   | [73]       |
| Parkinson's disease         | ROS     | ↑COR->↓ROS/↓MDA/↑SOD/↑GSH-Px->↓6-OHDA-INT/↑antioxide                                                                                             | PC12            | O   | [74]       |
| human osteoarthritis        | NF-κB   | ↑COR->↓p-IκB-α->↓p65 of NF-κB(nucleus)<br>->[↓COX-2->↓PGE2]&&[↓iNOS->↓NO]&&[↓MMP-13/↓IL-6]<br>->↓Inflammation                                    | IHOC            | O   | [66]       |
|                             |         | ↑IL-1β->↑p-IκB-α->↑p65 of NF-κB(cytoplasm→nucleus)<br>->↑COX-2/↑iNOS/↑MMP-13/↑IL-6->↑Inflammation                                                |                 |     |            |
| Kawasaki disease            | NF-κB   | ↑COR->↑p-LKB1->↑p-AMPK->↓ROS&& ↓NF-κB->↓LPS-induced TNFα->↓vasculitis                                                                            | RAW 264.7/BMDMs | O   | [39]       |
| LPS-induced inflammation    | NF-κB   | ↑COR/↑adenosine->↓TNF-α/↓PGE2->↓LPS induced Inflammation                                                                                         | RAW 264.7       | O   | [65]       |
|                             |         | ↑HEA->↓Toll-like receptor 4->↓p-IκB->↓p-p50(nucleus)/↓p-p60(nucleus)->↓TNF-α/↓PGE2 /↓COX-2->↓ Inflammation                                       |                 |     |            |
|                             |         | ↑LPS->↑Toll-like receptor 4<br>->↑IκB-α/↑p-IκB-α->↑IL-1β/↑TNF-α/↑COX-2/↑PGE2->↑ Inflammation                                                     |                 |     |            |
| asthma                      | MAPK    | ↑COR->↓eotaxin/↓ICAM-1/↓IL-4/↓IL-5/↓IL-13/↓airway/↓p-NF-κb/↓p-p38-MAPK->↓airway hyperreactivity                                                  | murine          | I   | [67]       |
| IDD                         | NF-κb   | ↑COR->↓MD/↓MI/↓p-NF-κb->↓Inflammation                                                                                                            | RNPC/IDO        | O   | [127]      |
| TBI                         | -       | ↑TBI->↓ZO-1/↓occludin                                                                                                                            | Rat             | I   | [68]       |
|                             |         | ↑COR->↓pro-inflammatory factors(↓IL-1β/↓Inos/↓MPO/↓MMP-9)<br>/↑anti-inflammation-associated factors(↑arginase 1/↑IL-10)/↓NOX1->↑BBBI             |                 |     |            |
| CA                          | MAPK    | ↑COR->↓IgE/↓eosinophils/↓neutrophils/↓IL-5/↓IL-13/↓p-p38-MAPK/↓TNF-α/↑A2AR/↓TGF-β1->↓airway remodeling                                           | Rat             | I   | [128]      |
| SCI                         | -       | ↑COR-EE->↓MMP-9->↓inflammatory cytokines&&mediators(↓TNF-α, ↓IL-1β/ ↓IL-6/↓COX-2/↓iNOS)&&↓chemokines(↓Gro-α/↓Mip-2α) /↓p-p38MAPK/↓proNGF->↓DBSCB | MSDR            | I   | [129]      |
| LISPIC                      | ROS     | ↑COR->↑p-c-Src->↑NADPH oxidase(↑p-p47phox subunit)<br>->↑ROS->↑Nrf2(nucleus)>↑HO-1->↓TNF-α/↓IL-6->↓Inflammation                                  | RAW264.7        | O   | [126]      |
| AD                          | -       | ↑COR->↓IL-13/IL-6/↓TNF-α/↓IL-1β->↓Inflammation                                                                                                   | HMC-1           | O   | [69]       |
| ASCN                        | -       | ↑COR->↓Caspase-9/↓MMP3->↓NILA                                                                                                                    | RDRGNs          | O   | [70]       |
| ALIL                        | NF-κb   | ↑COR->↓MPO/↓MDA/↓TNF-α/↓IL-1β/↓p-p65 NF-κb/↓p-I-κB/↑Nrf2<br>->↑HO-1->↓Inflammation                                                               | MBCM            | I   | [130]      |

Note:

O: *In vitro*. I: *in vivo*. &&: and. **RIOD**: radical-induced oxidative damage. **GSH-Px**: glutathione peroxidase. **SOD**: superoxide dismutase. **6-OHDA-INT**: 6-hydroxydopamine-induced neurotoxicity. **VC**: Vitamin C. **IL-1β**: interleukin-1beta. **IHOC**: IL-β-induced human osteoarthritis chondrocytes. **iNOS**: inducible nitric oxide synthase. **PGE2**: prostaglandin E2. **NO**: nitric oxide. **COX-2**: cyclo-oxygenase. **NF-κB**: nuclear factor kappa-B. **VE**: Vitamin E. **IκappaB-α**: the inhibitor of NF-κB in the cytoplasm. **iNOS**: inducible nitric oxide synthase. **IgE**: immunoglobulin E. **ICAM-1**: intercellular cell adhesion molecule-1. **IDD**: Intervertebral disc degeneration. **BBBI**: blood-brain barrier integrity. **MD/MI**: matrix degradation/macrophage infiltration. **ZO-1**: zonula occludens protein-1. **CA**: chronic asthma. **RNPC/IDO**: rat nucleus pulposus cell/intervertebral disc organ. **TBI**: traumatic brain injury. **RDRGNs**: rat spinal cord dorsal root ganglia neurons. **SCI**: spinal cord injury. **MSDR**: Male Sprague-Dawley rat. **MBCM**: Male BALB/c mice(6-8 weeks). **DBSCB**: disruption of blood-spinal cord barrier. **NILA**: neurotoxicity induced by local anesthesia(lidocaine). **HO-1**: heme oxygenase-1. **COR-EE**: cordycepin-enriched extract from *Cordyceps militaris*. **LISPIC**: LPS-induced secretion of proinflammatory cytokines. **ALIL**: acute lung injury induced by LPS. **ASCN**: local anesthesia(lidocaine) induced spinal cord neurotoxicity. **AD**: Atopic dermatitis. **Complex of Nrf2-Keap1**: the complex is present in the cytoplasm under normal conditions, thus, Keap1 is degraded via ubiquitination under stimuli(such as ROS) and Nrf2 then moves from the cytoplasm to the nucleus and binds related genes to regulate transcription.

**Table S4.** COR inhibiting polyadenylation of mRNA in pathogens.

| Ogenic Microorganism              | Type     | In vivo/In vitro                   | References |
|-----------------------------------|----------|------------------------------------|------------|
| <i>Bacillus subtilis</i>          | bacteria | In vitro                           | [76]       |
| adenovirus                        | virus    | In vitro                           | [77]       |
|                                   |          |                                    | [78]       |
| murine leukovirus                 | virus    | In vitro                           | [79]       |
| murine sarcoma virus              | virus    | In vitro                           | [80]       |
| Newcastle disease virus           | virus    | In vitro                           | [81]       |
| human rhino/poliiovirus           | virus    | In vitro                           | [82]       |
| tobacco mosaic virus              | virus    | In vitro                           | [83]       |
| vaccinia virus                    | virus    | In vitro                           | [84]       |
| Hepatitis C virus                 | virus    | In vitro                           | [85]       |
| <i>Clostridium parapatrificum</i> | bacteria | In vitro                           | [86]       |
| <i>Clostridium perfringens</i>    |          |                                    |            |
| Candida                           | fungus   | in in vivo<br>kidneys/liver/spleen | [87]       |

**Table S5.** Other medicinal value and biotechnological applications.

| Bioactivities                    | Mechanisms                                                                                                                                                                 | I/O | References |
|----------------------------------|----------------------------------------------------------------------------------------------------------------------------------------------------------------------------|-----|------------|
| insecticidal activities          | ↑COR->direct effect on <i>Plutella xylostella</i> rather than inhibiting chitin synthesis                                                                                  | I   | [89]       |
|                                  | ↑COR->Inducing programmed cell death of <i>Trypanosoma brucei</i>                                                                                                          | I   | [90]       |
|                                  | ↑COR&&↑pentostatin->↑induced curative death of <i>Trypanosoma evansi</i> in vivo mice                                                                                      | I   | [91]       |
|                                  | Combination of COR(2mg/kg)&&Pentostatin(0.2mg/kg) was efficient and low toxic therapy for mice infected with <i>Trypanosoma evansi</i>                                     | I   | [92]       |
| anti-skin photoaging             | ↑COR->↑p-IκB-α(cytoplasm)->↑p50 NF-κB (nucleus)/↑p65 NF-κB (nucleus) ->↓MMP-1/↓MMP-3                                                                                       | O   | [95]       |
| Preventing hyperlipidemia        | (In vivo) ↑COR->↓TC/↓TG/↓LDL-c                                                                                                                                             | I/O | [107]      |
|                                  | (In vitro) ↑COR->↑p-ACC/↑p-AMPK                                                                                                                                            |     |            |
| MUPR/ERI                         | ↑COR->Adenosine A3 receptor/↑p-eIF2α/↓ERI(transcription)->↓ATF4<br>->↓[CHOP]&&[GADD34->↑S-p-eIF2α]-> ↓ERA                                                                  | I/O | [62]       |
| Inhibiting fibrosis              | ↑COR->IRE1->ASK1->↓p-JUK->↓ERA                                                                                                                                             | O   | [96]       |
|                                  | ↑COR->↑E-cadherin/↓vimentin->↑Inhibiting lung fibrosis                                                                                                                     |     |            |
|                                  | ↑TGFβ1->↓E-cadherin/↑vimentin                                                                                                                                              | I/O | [97]       |
|                                  | ↑COR->↓CAGA box/↓BRE/↓p-Smad1/2/3/↑p-eIF2α->↑inhibiting kidney fibrosis                                                                                                    |     |            |
| ↑TGFβ1/↑BMP-4->↑BRE/↑p-Smad1/2/3 |                                                                                                                                                                            |     |            |
| IPVSM                            | ↑COR->↑Ras-GTP->↑p-ERK1/2->↑p27KIP1(CDK inhibitor)->↓CDK2- cyclin E /↓CDK4-cyclin D1 -> Arrest in G1 phase                                                                 | O   | [100]      |
| Inhibiting hepatotoxicity        | (adenosine transporter)↑COR->(insulin receptor)↓p-PKB/↑p-AMPK->↓mTORC1->↓C/EBPβ-> ↓PPARγ->↑Inhibiting adipogenesis                                                         | O   | [105]      |
|                                  | ↑CECM->↓AST/↓ALT/↑ADH/↑ALDH/↓LD->↓alcoholic-induced hepatotoxicity                                                                                                         | I   | [106]      |
| Effect on nervous system         | ↑COR->disrupting the translation in the nociceptor->↓chronic pain                                                                                                          | I   | [103]      |
|                                  | ↑COR->↓EPSPs /↓AMPA-RMR/↓NMDA-RMR/↓FMSEPC<br>->↑Inhibiting excitatory synaptic transmission                                                                                | O   | [18]       |
|                                  | ↑glutamate->(×)caspase 12/↑ROS/↑Ca <sup>2+</sup> influxes->↑oxidative and ER stress cell death                                                                             | O   | [19]       |
|                                  | ↑COR->Adenosine A1 receptor->↓ROS/↓Ca <sup>2+</sup> influxes->↑Bax<br>->↓MAPKs(JNK/ERK/p38)/↓CHOP->↓glutamate induced cell apoptosis and promoting neuroprotective effects |     |            |
|                                  | ↑COR->↓hyperalgesia in the peripheral nociceptors                                                                                                                          | I   | [102]      |
|                                  | ↑COR->↓CNAP' transduction Via L-type Ca <sup>2+</sup> channel                                                                                                              | O   | [101]      |
|                                  | ↑COR->↓PGE2->↓chronic pain                                                                                                                                                 | I   | [131]      |
|                                  | ↑COR->↑p-GluR1 S845/↑GluR1(↑AMPA-RMR)->↑Antidepressant Effect                                                                                                              | I   | [109]      |
|                                  | ↑COR->↓A-VGSC-Cs/↑TI-NaI-R->↑easily close VGSC/↑prolong transion from inactive VGSC to closed VGSC->↓hypoxia-induced neuronal injuries                                     | O   | [132]      |
| I/R injury                       | ↑COR->[↑IVDP]&&[↑p-Akt/↑p-GSK-3β/↑p-p70S6K]&&[↑Bcl-2/↓Bax/↓C-caspase-3/↑HO-1]<br>->↓myocardial infarction                                                                  | I   | [98]       |

|                                    |                                                                                                                                          |     |       |
|------------------------------------|------------------------------------------------------------------------------------------------------------------------------------------|-----|-------|
|                                    | ( <i>In vivo</i> extracellular brain)↑COR->↓glutamate/↓aspartate                                                                         | I/O | [99]  |
|                                    | ( <i>vitro</i> )↑COR->↓SOD/↓MDA/↓MMP-3->↓cerebral ischemia injury                                                                        |     |       |
| transcription inhibitor            | COR/actinomycin D as transcription inhibitors verify circadian rhythms                                                                   | O   | [116] |
|                                    | COR as transcription inhibitor to analysis RNA decay in Plant Heat Stress Tolerance assay                                                | O   | [117] |
| Inhibiting hyperlipidemia          | ↑COR->↑COR Interacts with $\gamma$ 1 subunit of AMPK->↑p-AMPK->↓lipid(intracellular)                                                     | O   | [108] |
| Inhibiting skeletal muscle fatigue | ↑COR/↑Ca <sup>2+</sup> influxes(Ca <sup>2+</sup> channel-dependent pathway)->↑MAMCF/inhibiting DMCF-RS/↑RARMC->↓skeletal muscle fatigue  | O   | [104] |
| Effect on bone                     | ↑COR->[↑Sox9/↑collagen type II]&&[↓Nrf2]->↑chondrogenesis                                                                                | O   | [112] |
|                                    | ↑COR->[↓PI3K->↑Bapx1]&&[Notch1/2->NICD->↓Hey1/↓Runx2->↓collagen type X/↓MMP13->↑inhibiting chondrocyte hypertrophy                       |     |       |
|                                    | ( <i>vitro</i> )↑COR ->↓ROS/↑IRF8/↓NFATc1->↓Osteoclastogenesis->↑Preventing Bone Loss                                                    | I/O | [110] |
|                                    | ( <i>vivo</i> )↑COR ->↓bone loss/↑sustain bone microarchitecture/↑recovery bone mineralization                                           |     |       |
|                                    | ↑COR->↓Ethanol-induced osteoclastogenesis /↑ $\beta$ -catenin/↑Runx2->↑Protecting FHOA                                                   | I/O | [111] |
| Antiplatelet                       | ↑CECM->↓thromboxane A2 synthase/↓arachidonic acid/↓p-p38-MAPK/↓p-ERK2->↓thromboxane A2->↑inhibiting platelet induced by collagen and ADP | I/O | [20]  |
| Study of molecular structure       | COR, as a ligand, is used in the molecular replacement experiments that are used to identify SAHase in <i>Bradyrhizobium elkanii</i>     | O   | [113] |
|                                    | COR is used as a RNA elongation inhibitor to control the transcriptional reaction rate.                                                  | O   | [13]  |
| Anti-hyperuricemia                 | ↑COR->↓uric acid transporter 1(kidney)->↓serum uric acid without affecting liver/renal/spleen functions                                  | I   | [133] |
| radiolabel                         | 3'-end radiolabeled with [ $\alpha$ - <sup>32</sup> P]-COR-TP                                                                            | O   | [21]  |

**Note:**

**&& and. TC:** total cholesterol. **TG:** Triglycerides. **LDL-c:** low-density lipoprotein cholesterol. **p-ACC:** phospho-acetyl-CoA carboxylase. **SOD:** superoxide dismutase. **MDA:** malondialdehyde. **PERK:** PKR-like ER kinase. ( $\times$ ): did not affect the target. **MUPR/ERI:** modulating unfolded protein response against endoplasmic reticulum stress-induced cell injury. **LD:** lipid droplet. **ERA:** endoplasmic reticulum stress-induced apoptosis. **ATF4:** transcription factor 4. **BMP-4:** bone morphogenetic protein-4. **S-p-eIF2 $\alpha$ :** sustained phosphorylation of eIF2 $\alpha$ . **[A]&&[B]:** involve pathways of A and B. **TGF $\beta$ 1:** transforming growth factor beta-1. **BRE:** bone morphogenetic protein-responsive element. **IPVSM:** Inhibiting proliferation of vascular smooth muscle. **CECM:** cordycepin-enriched *Cordyceps militaris*. **ADH:** alcohol dehydrogenase. **ALDH:** acetaldehyde dehydrogenase. **fEPSPs:** amplitudes of field excitatory postsynaptic potentials. **NMDA-RMR:** N-methyl-d-aspartic acid receptor-mediated responses. **AMPA-RMR:** alpha-amino-3-hydroxy-5-methyl-4-isoxazole-propionic acid receptor-mediated responses, such as GluR1 and GluR2. **FMSEPC:** frequency of miniature spontaneous excitatory postsynaptic currents. **CNAP:** compound nerve action potential. **PGE2:** prostaglandin-E2. **PFC:** prefrontal cortex. **HIP:** hippocampus. **TI-NaI-R:** time of inactive Na<sup>+</sup> influx recovery. **A-VGSC-Cs:** amplitude of voltage-gated sodium channel currents. **NaI:** Na<sup>+</sup> influx. **VGSC:** voltage-gated sodium channel. **IVDP:** left ventricular developed pressure. **HO-1:** heme oxygenase. **SMC:** skeletal muscle contraction. **I/R:** ischemic/reperfusion. **MAMCF:** The max amplitude of muscle contractile force. **DMCF-RS:** the decrease of muscle contractile force via repetitive stimulation.

**RARMC:** recovery amplitude and ratio of muscle contraction. **NFATc1:** nuclear factor of activated T cells c1. **IRF8:** interferon regulatory factor 8. **FHOA:** femoral head's osteonecrosis induced by Alcohol. **SAHase:** S-Adenosyl-L-homocysteine hydrolase.

**O:** *In vitro*(Out of body). **I:** *In vivo*(In body).

**Note:** The reference numbers in the supplementary tables are the same as those in the body of the paper.
